# Supplementary material for: Hepatocyte SLAMF3 reduced specifically the multidrugs resistance protein MRP-1 and increases HCC cells sensitization to anti-cancer drugs
Source: PubMed Central journal article supplement (PMC5078028; doi:10.18632/oncotarget.8679), 2016-04-11
Supplement: oncotarget-07-32493-s001.pdf [file oncotarget-07-32493-s001.pdf]

## Hepatocyte SLAMF3 reduced specifically the multidrug resistance protein MRP-1 and increases HCC cells sensitization to anti-cancer drugs

### SUPPLEMENTARY FIGURE

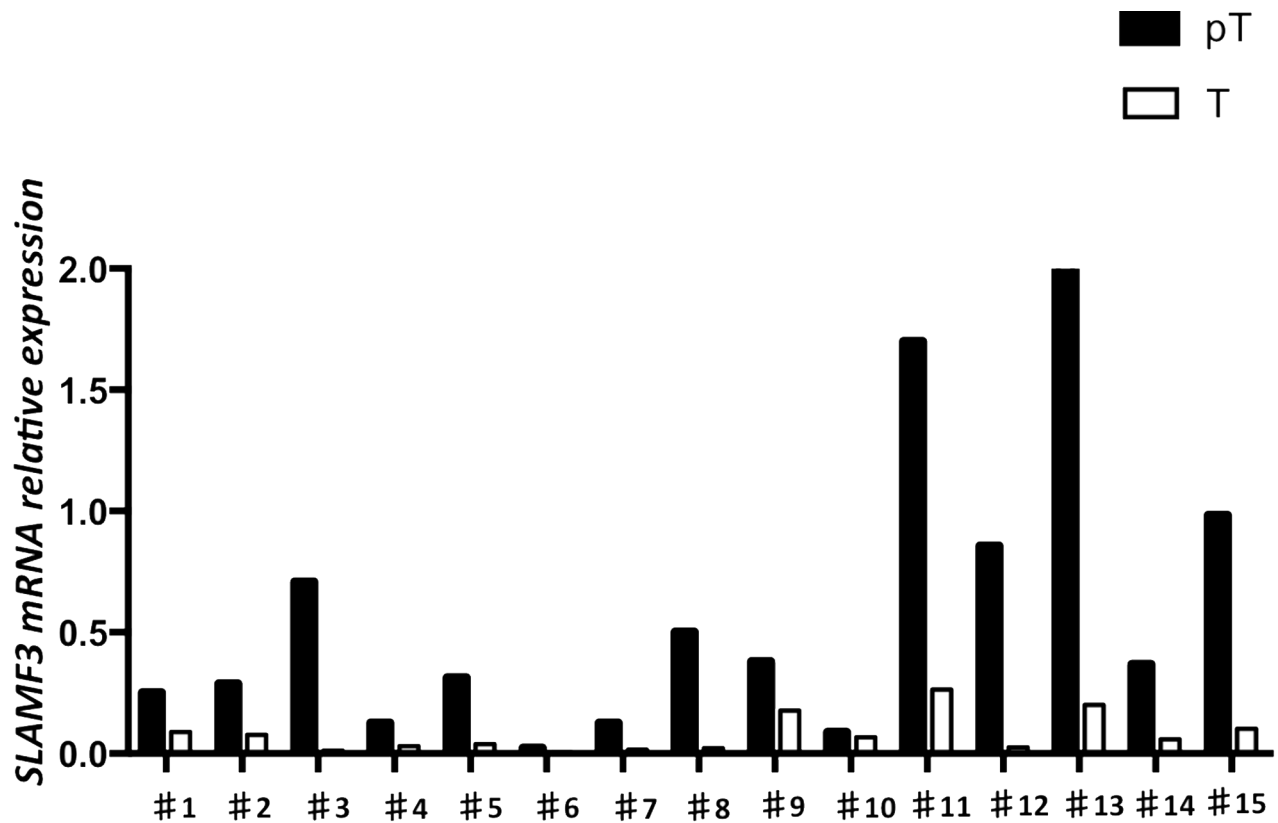

**Supplementary Figure S1: Expression of SLAMF3 transcripts in patients with HCC.** The mRNA quantification by qRT-PCR of SLAMF3 was carried out in 15 (n=15) of paired pT /T samples from HCC patients. Results are presented for each patient independently.
